# Supplementary material for: Luminescence quenching in self-assembled adducts of [Ru(dpp)3]2+ complexes and CdTe nanocrystals
Source: Royal Society of Chemistry journal article supplement (doi:10.1039/c1dt11054c), 2011-01-01
Supplement: c1dt11054c.pdf [file c1dt11054c.pdf]

**Supplementary Information**

**Luminescence quenching in self-assembled  
adducts of  $[\text{Ru}(\text{dpp})_3]^{2+}$  complexes and  
CdTe nanocrystals**

**Matteo Amelia,<sup>a</sup> Marc Font Molins,<sup>a</sup> and Alberto Credi<sup>\*a</sup>**

<sup>a</sup> *Photochemical Nanosciences Laboratory, Dipartimento di Chimica “G. Ciamician”, Università di Bologna, via Selmi 2, 40126 Bologna, Italy. Fax: +39 051 2099456; Tel: +39 051 2099540; E-mail: [alberto.credi@unibo.it](mailto:alberto.credi@unibo.it)*

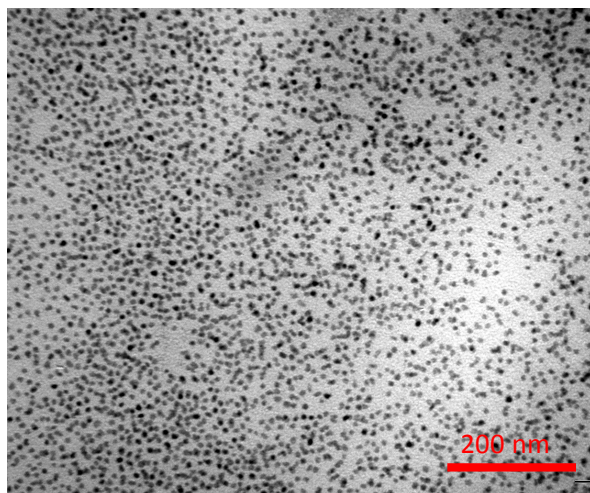

**Figure S1.** TEM picture of the CdTe quantum dots.

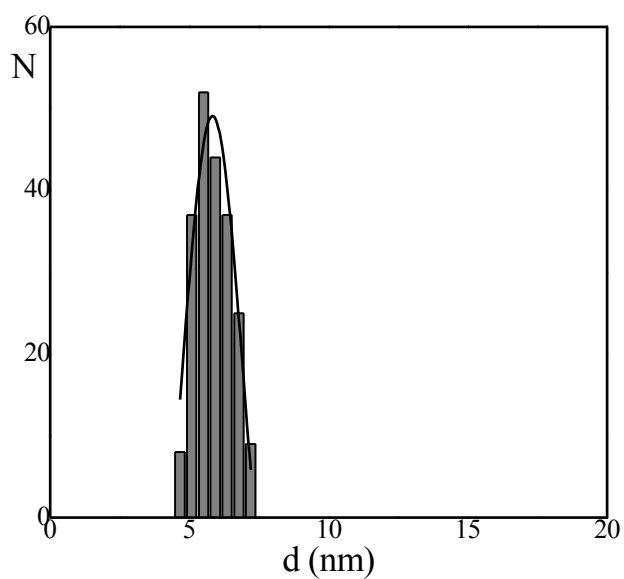

**Figure S2.** Size distribution analysis of the CdTe sample. The distribution has been calculated over about 200 nanocrystals in the previous image (Figure S1).
